# Supplementary material for: An allogeneic ‘off the shelf’ therapeutic strategy for peripheral nerve tissue engineering using clinical grade human neural stem cells
Source: PubMed Central journal article supplement (PMC5811594; doi:10.1038/s41598-018-20927-8), 2018-02-13
Supplement: 41598_2018_20927_MOESM1_ESM.pdf [file 41598_2018_20927_MOESM1_ESM.pdf]

## **An allogeneic 'off the shelf' therapeutic strategy for peripheral nerve tissue engineering using clinical grade human neural stem cells**

#C O'Rourke<sup>1</sup>, #AGE Day<sup>1</sup>, #C Murray-Dunning<sup>1</sup>, L Thanabalasundaram<sup>2</sup>, J. Cowan<sup>3</sup>, L Stevanato<sup>2</sup>, N Grace<sup>4</sup>, G Cameron<sup>4</sup>, RAL Drake<sup>4</sup>, J Sinden<sup>2</sup> & \*JB Phillips<sup>1</sup>

# *Authors contributed equally* to this work

<sup>1</sup>Department of Biomaterials & Tissue Engineering, UCL Eastman Dental Institute, University College London, London, UK

<sup>2</sup>ReNeuron, Pencoed, Bridgend, Wales

<sup>3</sup>Royal National Orthopaedic Hospital, Stanmore, UK

<sup>4</sup>Sartorius Stedim Biotech, Royston, UK

\*Corresponding author: James Phillips; [jb.phillips@ucl.ac.uk](mailto:jb.phillips@ucl.ac.uk)

## Supplementary Data

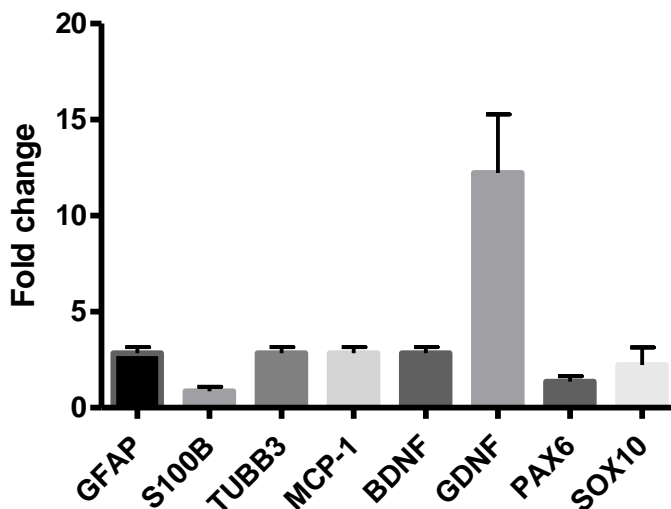

**Supplementary Figure 1: Real time PCR mRNA expression levels of neuronal and glial markers in differentiated CTX cells.** Cells were seeded at an initial density of 7000 cells/cm<sup>2</sup> and analysed after 2 weeks of differentiation (n=3; data are means  $\pm$  SEM relative to undifferentiated CTX cells). Total RNA was isolated using miRNeasy (Qiagen). A minimum of 250 ng of total RNA was reverse-transcribed into first-strand cDNA using a mix of random primer and poly-dT. Reverse transcription was performed with superscript II reverse transcriptase (Invitrogen) for 1 hr at 42°C, inactivated for 15 minutes at 70°C and cooled to 4°C. Two  $\mu$ l of cDNA were used in a PCR reaction containing 2x Roche master mix, 0.1  $\mu$ g of human universal probe library (UPL, Roche), and 0.4  $\mu$ M primers for neuronal markers:  $\beta$ III-tubulin (TUBB3), a well-established neuron-specific marker expressed by neuronal precursors, and glial markers: glial fibrillary acidic protein (GFAP) and S100B. The following primer sequences and UPL were used for each marker: TUBB3 (NM\_006086), F) gcaactacgtgggcgact, R) cgaggcacgtacttgtgaga UPL 78; GFAP (NM\_002055.3) F) ccagttgcagtccttgacct, R) ctccagggactcgttcgt, UPL 85 and S100B F) ggaaggggtgagacaagga R) ggtggaaaacgtcgtgatgag UPL 78. QRT-PCR results were expressed as relative quantification based on the  $2^{-\Delta\Delta ct}$  method and normalized against average of ATP5B and YWHAZ (PrimerDesign) housekeeping genes.

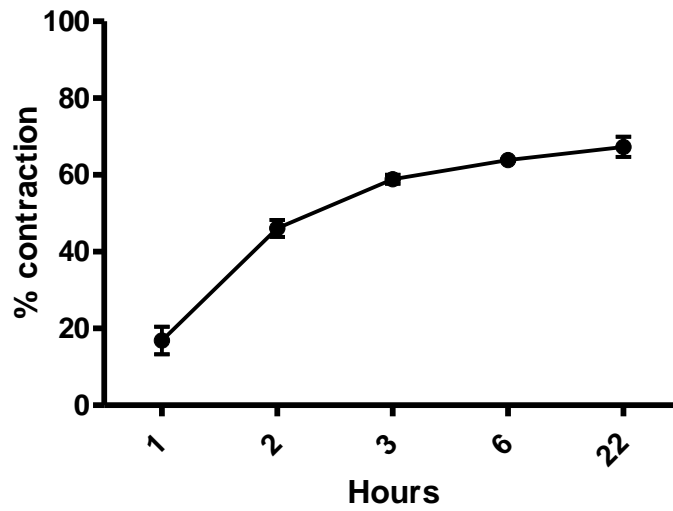

**Supplementary Figure 2: Contraction of EngNT-dCTX over time.** Differentiated CTX cells were set within collagen gels (2mg/ml) cast into tethering moulds at a density of  $2 \times 10^6$  per ml of collagen. Image analysis was used to calculate % contraction of the gels. Data are means  $\pm$  SEM.
